# Supplementary material
Source: PubMed Central journal article supplement (PMC3949107)
Supplement: tableS1.pdf [file tableS1.pdf]

Table S1. Total percentage of PRV-labeled cells innervating MWAT, IWAT, and both WAT depots. The percentage values were averaged across hamsters (n=6) and presented in tabular form as means  $\pm$  SE. ‡p<0.05 vs. MWAT; \*p<0.05 vs. MWAT + IWAT.

|                              | % MWAT            | % IWAT             | % MWAT + IWAT     | Total Mean of All PRV-Labeled Cells |
|------------------------------|-------------------|--------------------|-------------------|-------------------------------------|
| <b>Hindbrain</b>             |                   |                    |                   |                                     |
| 12/12N                       | 34.27 $\pm$ 3.10  | 37.85 $\pm$ 4.96   | 27.88 $\pm$ 5.90  | 280.00 $\pm$ 46.15                  |
| 10 (DMV)                     | 35.90 $\pm$ 2.33* | 37.96 $\pm$ 2.56*  | 26.14 $\pm$ 2.47  | 652.67 $\pm$ 124.12                 |
| A5                           | 26.20 $\pm$ 3.09  | 37.41 $\pm$ 2.74   | 36.39 $\pm$ 3.64  | 99.50 $\pm$ 32.53                   |
| Amb                          | 28.61 $\pm$ 2.61  | 40.08 $\pm$ 2.97*‡ | 31.31 $\pm$ 2.75  | 387.33 $\pm$ 78.86                  |
| AP                           | 30.11 $\pm$ 1.29  | 44.04 $\pm$ 3.75*‡ | 25.85 $\pm$ 3.06  | 447.33 $\pm$ 104.61                 |
| Bar                          | 28.99 $\pm$ 4.66  | 37.43 $\pm$ 5.93   | 33.58 $\pm$ 8.76  | 51.20 $\pm$ 5.63                    |
| C3                           | 16.46 $\pm$ 2.71  | 28.74 $\pm$ 12.21  | 54.80 $\pm$ 12.44 | 35.00 $\pm$ 12.64                   |
| Cu/Ecu                       | 35.91 $\pm$ 3.50* | 41.28 $\pm$ 3.29*  | 22.81 $\pm$ 2.05  | 198.00 $\pm$ 38.78                  |
| Facial regions               | 29.00 $\pm$ 3.00  | 37.17 $\pm$ 1.67   | 33.83 $\pm$ 4.59  | 739.83 $\pm$ 211.68                 |
| <b>Gigantocellular areas</b> |                   |                    |                   |                                     |
| DPGi                         | 24.70 $\pm$ 1.89  | 42.00 $\pm$ 4.27‡  | 33.29 $\pm$ 3.06  | 432.17 $\pm$ 49.63                  |
| Gi                           | 31.77 $\pm$ 2.93  | 36.83 $\pm$ 3.27   | 31.40 $\pm$ 1.60  | 1006.50 $\pm$ 168.33                |
| GiA                          | 29.94 $\pm$ 3.66  | 36.56 $\pm$ 2.77   | 33.49 $\pm$ 3.12  | 216.00 $\pm$ 71.19                  |
| GiV                          | 35.72 $\pm$ 3.52  | 33.81 $\pm$ 1.15   | 30.47 $\pm$ 3.68  | 1061.33 $\pm$ 126.57                |
| LPGi                         | 31.80 $\pm$ 2.76  | 35.12 $\pm$ 3.42   | 33.09 $\pm$ 2.88  | 1150.33 $\pm$ 184.46                |
| In/InM                       | 34.60 $\pm$ 4.22  | 40.77 $\pm$ 4.04*  | 24.62 $\pm$ 4.61  | 78.50 $\pm$ 14.28                   |
| LC                           | 35.63 $\pm$ 7.39  | 37.98 $\pm$ 5.41   | 26.39 $\pm$ 6.26  | 126.80 $\pm$ 26.59                  |
| Li                           | 26.66 $\pm$ 3.88  | 42.12 $\pm$ 5.02‡  | 31.22 $\pm$ 2.52  | 365.50 $\pm$ 108.57                 |

Table 1 (cont).

|                    | % MWAT        | % IWAT         | % MWAT +<br>IWAT | Total Mean of All<br>PRV-Labeled Cells |
|--------------------|---------------|----------------|------------------|----------------------------------------|
| Parabrachial areas |               |                |                  |                                        |
| LPB                | 26.88 ± 4.00  | 35.41 ± 6.14   | 37.71 ± 3.72     | 202.80 ± 87.89                         |
| MPB                | 26.08 ± 4.70  | 36.44 ± 6.86   | 37.48 ± 5.23     | 101.80 ± 35.98                         |
| Ppy                | 34.36 ± 2.71* | 46.39 ± 2.78*‡ | 19.25 ± 1.44     | 191.50 ± 32.40                         |
| Pr                 | 27.63 ± 2.73  | 38.88 ± 2.88‡  | 33.49 ± 1.36     | 209.50 ± 32.75                         |
| Raphe areas        |               |                |                  |                                        |
| DR                 | 28.59 ± 3.04  | 42.87 ± 5.25‡  | 28.54 ± 3.54     | 192.33 ± 36.27                         |
| RC                 | 35.66 ± 4.19  | 25.65 ± 8.95   | 38.69 ± 5.17     | 183.50 ± 34.86                         |
| CLi/RLi            | 29.76 ± 3.63  | 45.21 ± 4.23*‡ | 25.03 ± 2.12     | 63.67 ± 9.77                           |
| MnR                | 31.76 ± 4.06  | 39.90 ± 3.80   | 28.34 ± 5.52     | 29.33 ± 4.81                           |
| PMnR               | 35.57 ± 4.79  | 38.20 ± 5.87   | 26.23 ± 5.24     | 48.67 ± 6.46                           |
| RMg                | 25.90 ± 4.58  | 36.11 ± 2.39   | 37.80 ± 4.66     | 163.17 ± 39.32                         |
| ROb                | 33.60 ± 3.04  | 35.23 ± 1.66   | 31.17 ± 3.80     | 660.83 ± 121.82                        |
| RPa                | 31.38 ± 1.60* | 29.93 ± 2.09*  | 38.69 ± 2.74     | 269.67 ± 71.49                         |
| Reticular regions  |               |                |                  |                                        |
| IRt                | 28.60 ± 2.55  | 39.96 ± 3.06   | 31.44 ± 3.84     | 1094.83 ± 195.38                       |
| LRt/-PC            | 28.68 ± 2.60  | 46.22 ± 2.32*‡ | 25.10 ± 2.64     | 714.17 ± 334.06                        |
| Md-D/V             | 29.36 ± 2.73  | 39.40 ± 3.39   | 31.24 ± 2.92     | 992.00 ± 180.27                        |
| PCRt/-A            | 32.45 ± 3.86  | 40.70 ± 3.17*  | 26.84 ± 3.22     | 505.83 ± 113.70                        |
| PMn                | 34.34 ± 5.07  | 40.54 ± 0.96   | 25.12 ± 4.67     | 380.50 ± 148.36                        |

Table 1 (cont).

|                      | <b>% MWAT</b> | <b>% IWAT</b>  | <b>% MWAT +<br/>IWAT</b> | <b>Total Mean of All<br/>PRV-Labeled Cells</b> |
|----------------------|---------------|----------------|--------------------------|------------------------------------------------|
| RVL/C1               | 29.32 ± 4.43  | 39.23 ± 5.70   | 31.45 ± 1.80             | 566.83 ± 97.08                                 |
| RO                   | 42.90 ± 8.41  | 37.32 ± 6.54   | 19.78 ± 2.89             | 61.33 ± 10.41                                  |
| rs                   | 28.39 ± 1.19  | 36.29 ± 3.06   | 35.31 ± 2.56             | 471.33 ± 109.74                                |
| Sol                  | 26.42 ± 2.06  | 42.32 ± 3.32*‡ | 31.26 ± 2.59             | 3533.83 ± 586.94                               |
| Sub-CD/V             | 24.04 ± 2.12  | 35.17 ± 5.91   | 40.79 ± 6.01             | 301.50 ± 109.35                                |
| Trigeminal areas     | 32.10 ± 4.02  | 38.48 ± 2.68   | 29.43 ± 4.25             | 758.00 ± 205.03                                |
| Vestibular areas     | 32.01 ± 3.81  | 41.99 ± 2.21*‡ | 26.00 ± 2.56             | 552.00 ± 163.80                                |
| vsc                  | 31.28 ± 2.63  | 40.57 ± 2.46*‡ | 28.15 ± 2.39             | 1002.50 ± 166.14                               |
| <b>Midbrain</b>      |               |                |                          |                                                |
| Posterior commissure | 29.46 ± 3.50  | 46.68 ± 4.56*‡ | 23.86 ± 3.74             | 69.67 ± 23.34                                  |
| CnF                  | 25.97 ± 2.93* | 36.27 ± 3.31‡  | 37.76 ± 3.22             | 120.83 ± 29.82                                 |
| Dk                   | 15.78 ± 12.06 | 45.01 ± 5.49   | 39.21 ± 8.13             | 84.50 ± 30.85                                  |
| DpMe                 | 27.39 ± 4.23  | 39.65 ± 3.86   | 32.96 ± 4.88             | 160.33 ± 36.88                                 |
| EW                   | 24.66 ± 2.75  | 44.24 ± 3.89*‡ | 31.10 ± 3.63             | 52.83 ± 14.48                                  |
| InC                  | 40.67 ± 6.45  | 34.02 ± 4.25   | 25.31 ± 6.31             | 95.67 ± 28.42                                  |
| InCo                 | 25.19 ± 12.51 | 28.95 ± 4.70   | 45.86 ± 15.48            | 28.83 ± 10.53                                  |
| Lemniscus            | 28.28 ± 6.13  | 36.99 ± 3.71   | 34.73 ± 2.70             | 19.40 ± 5.07                                   |
| mlf                  | 29.12 ± 2.79  | 39.04 ± 2.93‡  | 31.84 ± 2.18             | 435.67 ± 71.00                                 |
| Oculomotor           | 29.95 ± 3.26  | 36.07 ± 3.65   | 33.97 ± 2.06             | 291.67 ± 76.58                                 |
| Peri Olivary         | 28.26 ± 5.51  | 34.66 ± 3.36   | 37.08 ± 6.28             | 65.17 ± 24.31                                  |
| PAG                  |               |                |                          |                                                |

Table 1 (cont).

|                 | <b>% MWAT</b> | <b>% IWAT</b>  | <b>% MWAT +<br/>IWAT</b> | <b>Total Mean of All<br/>PRV-Labeled Cells</b> |
|-----------------|---------------|----------------|--------------------------|------------------------------------------------|
| PAG anterior    | 25.88 ± 2.85  | 37.39 ± 4.69   | 36.72 ± 5.56             | 124.00 ± 28.56                                 |
| DLPAG           | 29.59 ± 2.69  | 45.23 ± 3.17*‡ | 25.17 ± 4.00             | 117.00 ± 20.56                                 |
| DMPAG           | 26.21 ± 2.85  | 36.76 ± 3.50‡  | 37.02 ± 4.19             | 197.50 ± 33.87                                 |
| LPAG            | 24.16 ± 2.96* | 38.37 ± 2.67‡  | 37.46 ± 3.78             | 445.33 ± 83.26                                 |
| VLPAG           | 26.82 ± 2.32  | 37.75 ± 3.58‡  | 35.44 ± 3.25             | 282.50 ± 55.14                                 |
| pn              |               |                |                          |                                                |
| PnC             | 29.04 ± 5.33  | 42.80 ± 5.04   | 28.16 ± 3.19             | 77.17 ± 30.03                                  |
| PnO             | 29.93 ± 4.65  | 30.87 ± 4.55   | 39.20 ± 6.10             | 135.33 ± 10.43                                 |
| PnR             | 27.50 ± 8.96  | 52.50 ± 13.58  | 20.00 ± 13.07            | 9.00 ± 3.70                                    |
| PnV             | 21.03 ± 1.34  | 57.67 ± 9.56   | 21.30 ± 8.54             | 23.75 ± 14.82                                  |
| pv              | 27.86 ± 4.87  | 35.63 ± 2.68   | 36.51 ± 3.83             | 68.50 ± 13.42                                  |
| R               | 30.01 ± 2.17  | 36.00 ± 3.23   | 33.98 ± 3.74             | 188.17 ± 32.98                                 |
| Rubral areas    | 23.60 ± 4.09* | 38.28 ± 2.96‡  | 38.12 ± 4.70             | 165.00 ± 46.53                                 |
| scp             | 28.07 ± 4.59  | 36.80 ± 4.17   | 35.13 ± 3.28             | 157.40 ± 50.52                                 |
| SN              | 30.62 ± 6.34  | 41.20 ± 5.24   | 28.18 ± 3.77             | 134.50 ± 36.58                                 |
| Tegmental areas |               |                |                          |                                                |
| ATg             | 18.89 ± 10.08 | 54.19 ± 8.75   | 26.93 ± 10.97            | 12.25 ± 3.90                                   |
| DMTg            | 28.39 ± 3.01  | 43.15 ± 5.48   | 28.45 ± 4.82             | 97.75 ± 35.97                                  |
| DTg-C/P         | 28.12 ± 8.37  | 52.56 ± 4.19   | 19.32 ± 6.12             | 32.20 ± 12.13                                  |
| LDTg/-V         | 22.63 ± 4.30* | 42.96 ± 3.80‡  | 34.41 ± 2.87             | 215.67 ± 84.31                                 |
| MiTg            | 23.16 ± 4.56  | 40.70 ± 10.12  | 36.13 ± 5.56             | 22.75 ± 3.92                                   |

Table 1 (cont).

|                     | <b>% MWAT</b> | <b>% IWAT</b> | <b>% MWAT +<br/>IWAT</b> | <b>Total Mean of All<br/>PRV-Labeled Cells</b> |
|---------------------|---------------|---------------|--------------------------|------------------------------------------------|
| PDTg                | 38.35 ± 5.85  | 41.00 ± 2.84  | 20.65 ± 5.81             | 30.33 ± 6.06                                   |
| PPTg                | 25.88 ± 2.07* | 33.37 ± 2.73‡ | 40.75 ± 2.40             | 219.17 ± 44.23                                 |
| RtTg/-P             | 29.18 ± 5.05  | 41.58 ± 8.97  | 29.24 ± 11.21            | 38.33 ± 10.55                                  |
| SPTg                | 27.28 ± 4.10  | 37.45 ± 3.50  | 35.27 ± 4.42             | 44.40 ± 14.77                                  |
| VLTg                | 21.39 ± 2.18  | 29.70 ± 4.65  | 48.92 ± 6.53‡            | 61.75 ± 7.60                                   |
| VTg                 | 23.30 ± 10.33 | 27.94 ± 9.90  | 48.77 ± 15.56            | 27.83 ± 8.32                                   |
| VTA                 | 25.56 ± 2.95  | 31.21 ± 6.14  | 43.22 ± 4.68             | 159.33 ± 41.45                                 |
| <b>Forebrain</b>    |               |               |                          |                                                |
| <i>Hypothalamic</i> |               |               |                          |                                                |
| AH                  | 38.92 ± 2.83* | 41.53 ± 2.48* | 19.54 ± 1.56             | 298.33 ± 74.58                                 |
| Arc                 | 33.09 ± 2.78  | 41.90 ± 3.50* | 25.00 ± 3.20‡            | 200.00 ± 51.94                                 |
| DM                  | 19.77 ± 7.01  | 35.67 ± 6.62  | 44.56 ± 12.71            | 288.83 ± 63.52                                 |
| DTM                 | 24.44 ± 5.67  | 42.16 ± 9.34  | 33.40 ± 11.43            | 43.60 ± 5.26                                   |
| LA                  | 35.45 ± 3.18* | 45.28 ± 1.24* | 19.27 ± 4.02             | 74.33 ± 15.67                                  |
| LH                  |               |               |                          |                                                |
| LH proper           | 28.42 ± 2.67  | 38.65 ± 2.60‡ | 32.94 ± 2.67             | 617.83 ± 148.17                                |
| subZI               | 33.63 ± 1.35  | 30.33 ± 2.33  | 36.04 ± 2.09             | 241.50 ± 37.07                                 |
| Pe/AVPe             | 39.56 ± 1.82* | 39.00 ± 2.45* | 21.44 ± 1.59             | 490.50 ± 76.94                                 |
| PH                  | 28.45 ± 3.08  | 37.36 ± 4.42  | 34.19 ± 2.92             | 198.83 ± 92.70                                 |
| ADP                 | 34.93 ± 3.03  | 36.68 ± 4.13  | 28.39 ± 3.41             | 66.17 ± 14.60                                  |

Table 1 (cont).

|              | <b>% MWAT</b> | <b>% IWAT</b> | <b>% MWAT +<br/>IWAT</b> | <b>Total Mean of All<br/>PRV-Labeled Cells</b> |
|--------------|---------------|---------------|--------------------------|------------------------------------------------|
| POA          |               |               |                          |                                                |
| LPO          | 29.40 ± 3.97  | 32.82 ± 4.23  | 37.78 ± 3.10             | 244.50 ± 44.24                                 |
| MnPO         | 29.17 ± 8.11  | 36.75 ± 11.72 | 34.08 ± 9.19             | 38.40 ± 11.82                                  |
| MPA          | 27.28 ± 2.67  | 38.85 ± 3.62‡ | 33.87 ± 1.89             | 473.00 ± 83.49                                 |
| MPO-C/L/M    | 31.09 ± 4.03  | 40.10 ± 3.82* | 28.81 ± 1.62             | 443.83 ± 59.65                                 |
| StA          | 46.43 ± 3.57* | 33.93 ± 8.93  | 19.64 ± 5.36             | 5.50 ± 1.50                                    |
| VLPO         | 29.17 ± 2.93  | 39.28 ± 6.10  | 31.55 ± 4.17             | 43.60 ± 15.42                                  |
| VMPO         | 39.35 ± 17.11 | 29.12 ± 10.01 | 31.54 ± 8.27             | 14.80 ± 5.89                                   |
| VOLT         | 37.00 ± 3.07* | 45.71 ± 5.24* | 17.29 ± 7.47             | 16.80 ± 3.85                                   |
| PVH          |               |               |                          |                                                |
| PaAP         | 39.41 ± 4.29  | 34.81 ± 6.26  | 25.77 ± 2.99             | 76.67 ± 16.75                                  |
| PaDC         | 32.54 ± 3.60  | 32.16 ± 4.90  | 35.29 ± 6.80             | 50.67 ± 13.68                                  |
| PaLM         | 33.84 ± 3.10  | 31.95 ± 2.66  | 34.21 ± 3.11             | 171.33 ± 29.47                                 |
| PaMM         | 38.58 ± 3.21* | 34.40 ± 2.00* | 27.02 ± 1.88             | 227.67 ± 34.84                                 |
| PaMP         | 36.08 ± 2.58* | 36.57 ± 2.45* | 27.35 ± 2.05             | 213.33 ± 34.90                                 |
| PaPo         | 30.79 ± 3.44  | 38.94 ± 3.81  | 30.28 ± 3.93             | 112.83 ± 28.14                                 |
| PaV          | 37.62 ± 6.31  | 36.17 ± 8.51  | 26.21 ± 3.54             | 69.17 ± 12.77                                  |
| SPa          | 42.69 ± 3.18* | 37.77 ± 3.86* | 19.54 ± 3.64             | 48.83 ± 9.67                                   |
| SCh          |               |               |                          |                                                |
| SCh anterior | 39.88 ± 8.94* | 41.44 ± 7.49  | 18.68 ± 3.73             | 83.67 ± 16.31                                  |

Table 1 (cont).

|                              | <b>% MWAT</b> | <b>% IWAT</b> | <b>% MWAT +<br/>IWAT</b> | <b>Total Mean of All<br/>PRV-Labeled Cells</b> |
|------------------------------|---------------|---------------|--------------------------|------------------------------------------------|
| SChDM                        | 38.60 ± 9.56  | 43.72 ± 5.48* | 17.68 ± 6.20             | 36.83 ± 8.40                                   |
| SChVL                        | 33.74 ± 5.34  | 42.07 ± 6.49  | 24.19 ± 5.27             | 35.67 ± 11.39                                  |
| VMH                          | 31.20 ± 1.96  | 42.15 ± 4.64* | 26.65 ± 3.54             | 142.83 ± 36.24                                 |
| <i>Thalamic</i>              |               |               |                          |                                                |
| PF                           | 27.77 ± 5.22  | 35.06 ± 5.42  | 37.18 ± 5.71             | 80.33 ± 31.15                                  |
| Re/VRe/Xi                    | 36.27 ± 1.81* | 37.66 ± 1.62* | 26.07 ± 2.71             | 222.00 ± 46.41                                 |
| <b>Other forebrain areas</b> |               |               |                          |                                                |
| BST                          | 35.88 ± 2.92* | 38.06 ± 3.08* | 26.07 ± 3.31             | 499.50 ± 151.57                                |
| Fascicular                   | 29.66 ± 4.52  | 40.53 ± 3.06  | 29.81 ± 5.74             | 74.00 ± 20.36                                  |
| LS                           | 35.48 ± 5.37  | 37.69 ± 7.86  | 26.83 ± 3.05             | 31.67 ± 6.69                                   |
| Mammillary bodies            | 32.23 ± 6.88  | 35.97 ± 7.72  | 31.79 ± 8.40             | 119.33 ± 38.30                                 |
| PeF                          | 23.10 ± 3.83  | 45.39 ± 7.20  | 31.51 ± 8.47             | 49.00 ± 10.56                                  |
| PSTh                         | 24.78 ± 5.14  | 35.98 ± 4.74  | 39.24 ± 6.17             | 131.20 ± 49.05                                 |
| SI                           | 34.04 ± 3.43  | 39.08 ± 2.89  | 26.88 ± 3.95             | 123.67 ± 27.05                                 |
| TC                           | 32.60 ± 4.39  | 44.93 ± 7.21* | 22.47 ± 5.03             | 43.00 ± 13.88                                  |
| VP                           | 31.51 ± 2.94* | 45.51 ± 2.51* | 22.97 ± 1.61             | 100.00 ± 65.13                                 |
| ZI                           | 35.29 ± 1.92  | 36.03 ± 2.51  | 28.67 ± 3.22             | 215.00 ± 52.44                                 |

**Hindbrain:** 12/12N, hypoglossal nucleus; 10 (DMV), dorsal motor nucleus of vagus; A5, A5 noradrenaline cells; Amb, ambiguus nucleus; AP, area postrema; Bar, Barrington's nucleus; C3, C3 adrenaline cells; Cu/Ecu, cuneate nucleus/external cuneate nucleus; DPGi, dorsal

paragigantocellular nucleus; Gi, gigantocellular reticular nucleus; GiA, gigantocellular reticular nucleus, alpha part; GiV, gigantocellular reticular nucleus, ventral part; LPGi, lateral paragigantocellular nucleus; In/InM, intercalated nucleus of the medulla/intermedius nucleus of the medulla; LC, locus coeruleus; Li, linear nucleus of the medulla; LPB, lateral parabrachial nucleus; MPB, medial parabrachial nucleus; Ppy, peripyramidal nucleus; Pr, prepositus nucleus; DR, dorsal raphe nucleus; RC, raphe cap; CLi/RLi, caudal linear nucleus of the raphe/rostral linear nucleus of the raphe; MnR, median raphe nucleus; PMnR, paramedian raphe nucleus; RMg, raphe magnus nucleus; ROb, raphe obscurus nucleus; RPa, raphe pallidus nucleus; IRt, intermediate reticular nucleus; LRt/-PC, lateral reticular nucleus/-parvicellular part; Md-D/V, medullary reticular nucleus-dorsal/ventral parts; PCRt/-A, parvicellular reticular nucleus/-alpha part; PMn, paramedian reticular nucleus; RVL/C1, rostroventrolateral reticular nucleus/C1 adrenaline cells; Ro, nucleus of Roller; rs, rubrospinal tract; Sol, nucleus of the solitary tract; Sub-CD/V, subcoeruleus nucleus-dorsal/ventral parts; vsc, ventral spinocerebellar tract.

**Midbrain:** CnF, cuneiform nucleus; Dk, nucleus of Darkschewitsch; DpMe, deep mesencephalic nucleus; EW, Edinger-Westphal nucleus; InC, interstitial nucleus of Cajal; InCo, intercollicular nucleus; mlf, medial longitudinal fasciculus; PAG, periaqueductal gray; PAG anterior, periaqueductal gray anterior; DLPAG, dorsolateral periaqueductal gray; DMPAG, dorsomedial periaqueductal gray; LPAG, lateral periaqueductal gray; VLPAG, ventrolateral periaqueductal gray; Pn, pontine nuclei; PnC, pontine reticular nucleus nucleus, caudal part; PnO, pontine reticular nucleus, oral part; PnR, pontine raphe nucleus; PnV, pontine reticular nucleus, ventral part; pv, periventricular fiber system; R, red nucleus; scp, superior cerebellar peduncle; SN, substantia nigra; ATg, anterior tegmental nucleus; DMTg, dorsomedial tegmental area; DTg-C/P, dorsal tegmental nucleus -central/pericentral parts; LDTg/-V, laterodorsal tegmental



nucleus/-ventral part; MiTg, microcellular tegmental nucleus; PDTg, posterodorsal tegmental nucleus; PPTg, pedunclopontine tegmental nucleus; RtTg/-P, reticulotegmental nucleus of the pons/-pericentral part; SPTg, subpeduncular tegmental nucleus; VLTg, ventrolateral tegmental area; VTg, ventral tegmental nucleus; VTA, ventral tegmental area. **Forebrain:** AH, anterior hypothalamus; Arc, arcuate nucleus; DM, dorsomedial hypothalamic nucleus; DTM, dorsal tuberomammillary nucleus; LA, lateroanterior hypothalamic nucleus; LH, lateral hypothalamic area; LH proper, lateral hypothalamic area proper; subZI, sub-zona incerta; Pe/AVPe, periventricular hypothalamic nucleus/anteroventral periventricular nucleus; PH, posterior hypothalamic area; ADP, anterodorsal preoptic nucleus; POA, preoptic area; LPO, lateral preoptic area; MnPO, median preoptic nucleus; MPA, medial preoptic area; MPO-C/L/M, medial preoptic nucleus-central/lateral/medial parts; StA, strial part of the preoptic area; VLPO, ventrolateral preoptic nucleus; VMPO, ventromedial preoptic nucleus; VOLT, vascular organ of the lamina terminalis; PVH, paraventricular nucleus of the hypothalamus; PaAP, paraventricular hypothalamic nucleus, anterior parvicellular part; PaDC, paraventricular hypothalamic nucleus, dorsal cap; PaLM, paraventricular hypothalamic nucleus, lateral magnocellular part; PaMM, paraventricular hypothalamic nucleus, medial magnocellular part; PaMP, paraventricular hypothalamic nucleus, medial parvicellular part; PaPo, paraventricular hypothalamic nucleus, posterior part; PaV, paraventricular hypothalamic nucleus, ventral part; SPa, subparaventricular zone of the hypothalamus; SCh, suprachiasmatic nucleus; SCh, anterior, suprachiasmatic nucleus, anterior; SChDM, suprachiasmatic nucleus, dorsomedial part; SChVL, suprachiasmatic nucleus, ventrolateral part; VMH, ventromedial hypothalamic nucleus; PF, parafascicular thalamic nucleus; Re/VRe/Xi, reuniens thalamic nucleus/ventral reuniens thalamic nucleus/xiphoid thalamic nucleus; BST, bed nucleus of the stria terminalis; LS, lateral septal

nucleus; PeF, perifornical nucleus; PSTh, parasubthalamic nucleus; SI, substantia innominata;  
TC, tuber cinereum area; VP, ventral pallidum; ZI, zona incerta.
